# Supplementary material for: Suppressing Jahn–Teller distortion and locking lattice water with doped Fe(iii) in birnessite toward fast and stable zinc-ion batteries
Source: Royal Society of Chemistry journal article supplement (doi:10.1039/d4mh00544a), 2024-01-01
Supplement: d4mh00544a1.pdf [file d4mh00544a1.pdf]

## Supporting Information

### **Palliating Jahn-Teller distortion and locking lattice water with doped Fe (III) in birnessite toward fast and stable zinc-ion batteries**

Xiang Li,<sup>†a</sup> Yanchun Sun,<sup>†a</sup> Le Zhou,<sup>a</sup> Haiyan Wang,<sup>\*a</sup> Binbin Xie,<sup>\*b</sup> Wen Lu,<sup>a</sup> Jiqiang Ning,<sup>c</sup> and Yong Hu<sup>\*d</sup>

## Experimental Section

*Chemicals and raw materials:* All the chemicals of analytical grade were purchased from Sinopharm Chemical Reagent Co., Ltd. (China) and used directly without further purification. The carbon paper (TGP-H-060) was obtained from Toray Co., Ltd. (Japan). The commercial zinc foil with a thickness of 100  $\mu\text{m}$  was purchased from Sinopharm Chemical Reagent Co., Ltd. (China).

*Synthesis of Fe-NMO·xH<sub>2</sub>O:* Fe doped Na<sub>0.55</sub>Mn<sub>2</sub>O<sub>4</sub>·xH<sub>2</sub>O (Fe-NMO·xH<sub>2</sub>O) was prepared using a coprecipitation method at room temperature. In a typical synthesis, 0.5 mmol of trisodium citrate dihydrate (Na<sub>3</sub>C<sub>6</sub>H<sub>5</sub>O<sub>7</sub>·2H<sub>2</sub>O), 3 mmol of NaOH, and 0.1 mmol of (CH<sub>3</sub>COO)<sub>2</sub>Mn·4H<sub>2</sub>O were dissolved in 40 mL of deionized water to get a clear solution A. 0.2 mmol of K<sub>3</sub>[Fe(CN)<sub>6</sub>] was dissolved in 20 mL of deionized water to gain a clear solution B. Then, solution B was dripped into solution A under vigorous stirring for 1 min, and the mixture was aged for 24 h to obtain the precipitate. Finally, the resulting precipitate was collected, washed with deionized water and ethanol several times, and dried in an oven at 60 °C overnight to obtain Fe-NMO·xH<sub>2</sub>O. The comparison samples of Fe<sub>0.1</sub>-NMO·xH<sub>2</sub>O, and Fe<sub>0.3</sub>-NMO·xH<sub>2</sub>O were synthesized by changing the amounts of K<sub>3</sub>[Fe(CN)<sub>6</sub>] from 0.1 mmol to 0.3 mmol, respectively.

*Synthesis of NMO·xH<sub>2</sub>O:* NMO·xH<sub>2</sub>O was prepared using the similar method as Fe-NMO·xH<sub>2</sub>O but without the addition of K<sub>3</sub>[Fe(CN)<sub>6</sub>].

*Synthesis of Fe-NMO·xH<sub>2</sub>O-T:* Fe-NMO·xH<sub>2</sub>O was calcined at 300 °C for 1 h in air to prepare Fe-NMO·xH<sub>2</sub>O-T.

*Characterizations:* The field-emission scanning electron microscopy (FESEM) images of the samples were operated on a scanning electron micro-analyzer (Hitachi S-4800). The microstructures of the materials were investigated with transmission electron microscopy (TEM) and high-resolution TEM (HRTEM), which were performed on a JEM-2100F field emission micro-analyzer at an accelerating voltage of 200 kV. Powder X-ray diffraction

(XRD) was carried out on a Bruker D8 Advance diffractometer with Cu-K $\alpha$  radiation. Thermogravimetry analysis (TGA) was conducted on the NETZSCH STA449 F5 with a nitrogen flow. X-ray photoelectron spectroscopy (XPS) was carried out on an ESCALab MKII X-ray photoelectron spectrometer with Al K $\alpha$  X-ray radiation as the excitation source. Raman spectra were collected on a Renishaw in Via-Refles with a 532 nm laser.

*Assembly of Zn-ion batteries:* The electrochemical performance of the materials was investigated by assembling a CR2025 coin cell. For the preparation of the cathode, Fe-NMO $\cdot$ xH $_2$ O, polyvinylidene fluoride, and conductive carbon black with a mass ratio of 8:1:1 were dispersed in 1-methyl-2-pyrrolidone solvent and ground into a pulp. Then the pulp was coated on carbon paper with a mass loading of  $\sim$ 1.2 mg for the active materials and then dried in a vacuum oven at 80 °C for 12 h. Before assembly, the commercial zinc foil (100  $\mu$ m) was polished with sandpaper, and wiped with ethanol to remove the surface oxide layer and impurities. The as-fabricated cathode and the processed Zn foil anode separated by a Whatman filter separator were further assembled into a CR2025 coin cell with 2 M ZnSO $_4$  and 0.2 M MnSO $_4$  aqueous solution (100  $\mu$ L) as the electrolyte. In addition, to explore the energy storage mechanism of Fe-NMO $\cdot$ xH $_2$ O, 0.2 M MnSO $_4$ , 0.2 M Zn(OTf) $_2$  in acetonitrile (denoted as AN), and 0.2 M Zn(OTf) $_2$  in AN + 1 wt.% H $_2$ O electrolytes with the same volume of 100  $\mu$ L was also employed to assemble the Zn-ion battery.

*Electrochemical measurements:* The electrochemical performances were evaluated by cyclic voltammetry (CV), galvanostatic charge/discharge (GCD), and electrochemical impedance spectroscopy (EIS) measurements. CV and EIS data were collected on a CHI660E workstation. GCD was carried out on a LAND CT3001A battery testing system.

*Computational details:* All density functional theory (DFT) calculations<sup>1,2</sup> were carried out using the Projector-Augmented Wave (PAW) method<sup>3</sup> as implemented in the Vienna Ab-initio Simulation Package (VASP).<sup>4</sup> The exchange-correlation energy was described by the Perdew-Burke-Ernzerh (PBE) functional<sup>5</sup> developed by Perdew, Burke, and Ernzerhof at the

generalized gradient approximation (GGA). The Hubbard-U corrections<sup>6</sup> (a U-J value of 4.0 for Mn and Fe) and DFT-D3 corrections<sup>7</sup> were taken into account for more accurate calculations. The kinetic energy cutoff of electron wave functions was set to 400 eV. The conjugated gradient method was performed to obtain all equilibrium geometries with the convergence threshold of energy and force to be  $10^{-4}$  eV and 0.04 eV/Å, respectively. A five-layer model (an  $11.82 \text{ Å} \times 11.40 \text{ Å} \times 16.19 \text{ Å}$  box) was constructed for the bare  $\text{Na}_{0.55}\text{Mn}_2\text{O}_4 \cdot x\text{H}_2\text{O}$  material (denoted as  $\text{NMO} \cdot x\text{H}_2\text{O}$ ), which includes three  $\text{MnO}_2$  (001) layers and two lattice water layers. Similarly, for Fe-doped material, a Mn atom on the topmost layer of  $\text{NMO} \cdot x\text{H}_2\text{O}$  was substituted by a Fe atom, referred to as  $\text{Fe-NMO} \cdot x\text{H}_2\text{O}$ . In addition, we also built a Fe-doped model without lattice water for comparison ( $\text{Fe-NMO}$ ), which had the cell size of  $10.36 \text{ Å} \times 11.650 \text{ Å} \times 13.18 \text{ Å}$ .

All calculations including geometry optimization, single-point energy, electronic density, and density of states were carried out under a periodic boundary condition using a gamma centered k-point mesh. A very large vacuum space of 40 Å in the z direction was adopted to eliminate interactions between successive slabs, especially for the calculations of the exfoliation energy ( $E_{\text{exf}}$ ). The charge differential density and density of states were calculated and depicted with VASPKIT and VESTA.<sup>8,9</sup> The exfoliation energy was defined as:

$$E_{\text{exf}} = E_{\text{layered}} - E_{\text{enlarged } 20 \text{ Å}} \quad (\text{S1})$$

where  $E_{\text{layered}}$ , and  $E_{\text{enlarged } 20 \text{ Å}}$  were the DFT calculated energies of the  $\text{NMO} \cdot x\text{H}_2\text{O}$  or  $\text{Fe-NMO} \cdot x\text{H}_2\text{O}$  material with normal interlayer spacing and enlarged interlayer spacing (20 Å). Similarly, the absorption energy ( $E_{\text{abs}}$ ) between the materials ( $\text{NMO} \cdot x\text{H}_2\text{O}$  or  $\text{Fe-NMO} \cdot x\text{H}_2\text{O}$ ) and other species (the Zn atom or the water layer) was written as:

$$E_{\text{abs}} = E_{\text{material+other}} - E_{\text{other}} - E_{\text{material}} \quad (\text{S2})$$

where  $E_{\text{material+other}}$  was the total energy of material and other species,  $E_{\text{material}}$  was the energy of the material and  $E_{\text{other}}$  was the energy of other species.

*Calculations:* The specific capacity ( $C_s$ , mAh g<sup>-1</sup>) of the samples was calculated based on the discharge curve. The equation for calculating  $C_s$  is shown as follows:

$$C_s = \frac{\int_0^t I dt}{m} \quad (S3)$$

where  $I$  (mA) represents the discharge current,  $t$  (h) is the discharge time, and  $m$  (g) means the mass loading of the active materials.

Energy density  $E$  (Wh kg<sup>-1</sup>) and power density  $P$  (W kg<sup>-1</sup>) were calculated according to Equations S4 and S5, respectively:

$$E = C_s V \quad (S4)$$

$$P = \frac{3600E}{t} \quad (S5)$$

where  $V$  (V) represents the platform voltage,  $t$  (s) is the discharge time.

The activation energy ( $E_a$ ) is calculated according to the Arrhenius equation:

$$\frac{1}{R_{ct}} = A \exp\left(-\frac{E_a}{RT}\right) \quad (S6)$$

where  $R_{ct}$  represents the charge transfer resistance,  $A$  is pre-exponential factor,  $T$  and  $R$  are the temperature and the gas constant, respectively.

## Supplementary Figures

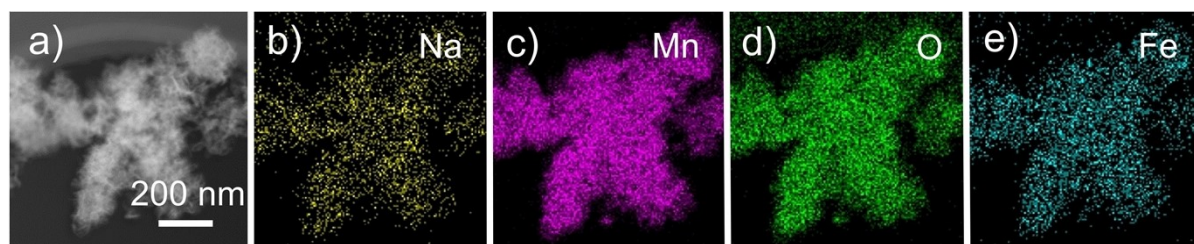

**Fig. S1** (a) STEM image of the as-prepared Fe-NMO·xH<sub>2</sub>O and corresponding elemental mapping images of (b) Na, (c) Mn, (d) O, (e) Fe.

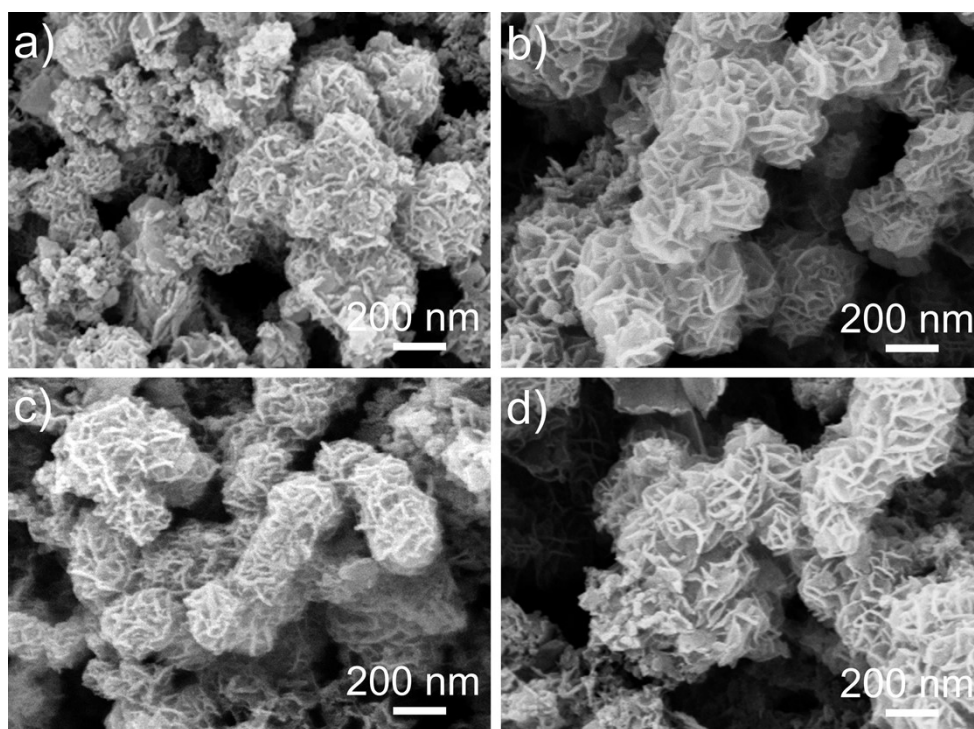

**Fig. S2** FESEM images of the as-prepared (a)  $\text{NMO} \cdot x\text{H}_2\text{O}$ , (b)  $\text{Fe}_{0.1}\text{-NMO} \cdot x\text{H}_2\text{O}$ , (c)  $\text{Fe}_{0.3}\text{-NMO} \cdot x\text{H}_2\text{O}$ , and (d)  $\text{Fe-NMO} \cdot x\text{H}_2\text{O-T}$  samples.

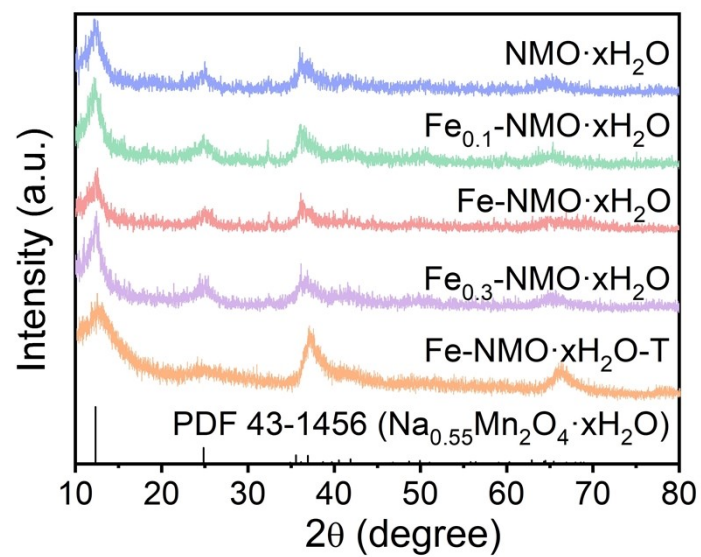

**Fig. S3** XRD patterns of the as-prepared NMO·xH<sub>2</sub>O, Fe<sub>0.1</sub>-NMO·xH<sub>2</sub>O, Fe-NMO·xH<sub>2</sub>O, Fe<sub>0.3</sub>-NMO·xH<sub>2</sub>O and Fe-NMO·xH<sub>2</sub>O-T samples.



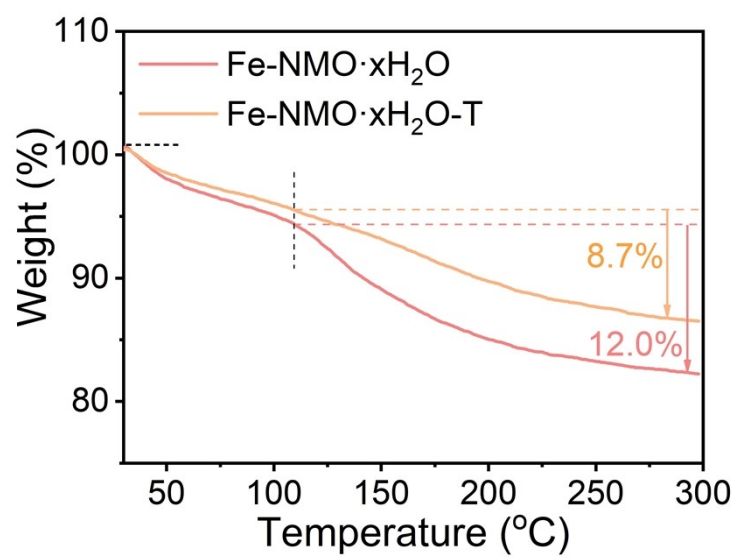

**Fig. S4** TGA curves of the as-prepared Fe-NMO·xH<sub>2</sub>O and Fe-NMO·xH<sub>2</sub>O-T samples.

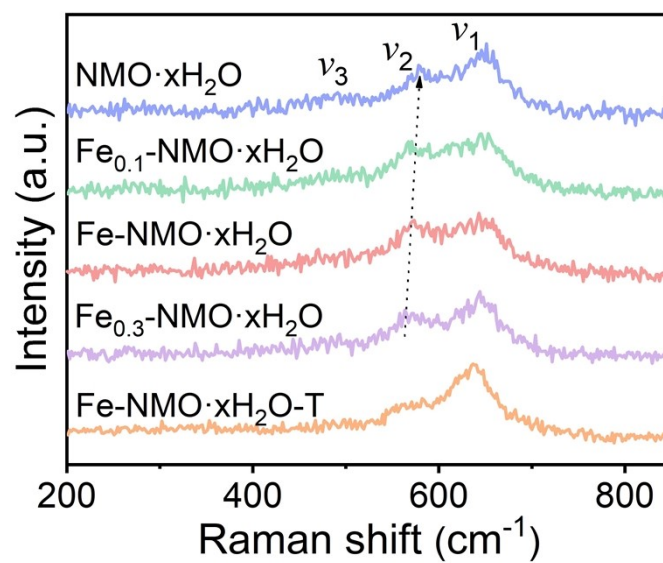

**Fig. S5** Raman spectra of the as-prepared  $\text{NMO} \cdot x\text{H}_2\text{O}$ ,  $\text{Fe}_{0.1}\text{-NMO} \cdot x\text{H}_2\text{O}$ ,  $\text{Fe-NMO} \cdot x\text{H}_2\text{O}$ ,  $\text{Fe}_{0.3}\text{-NMO} \cdot x\text{H}_2\text{O}$  and  $\text{Fe-NMO} \cdot x\text{H}_2\text{O-T}$  samples.

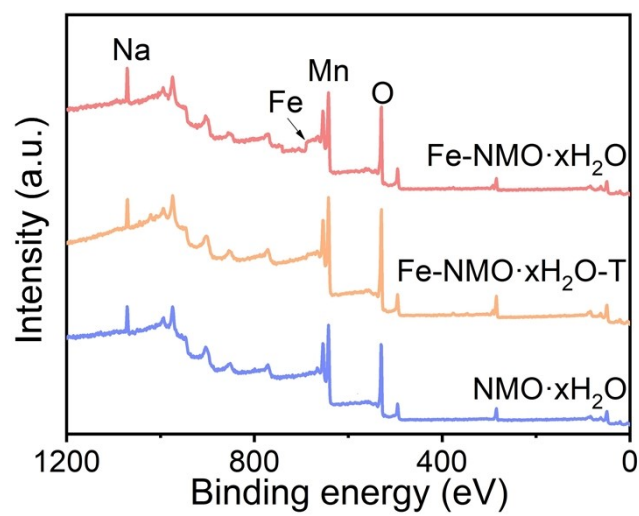

**Fig. S6** XPS survey spectra of the as-prepared Fe-NMO·xH<sub>2</sub>O, Fe-NMO·xH<sub>2</sub>O-T, and NMO·xH<sub>2</sub>O samples.

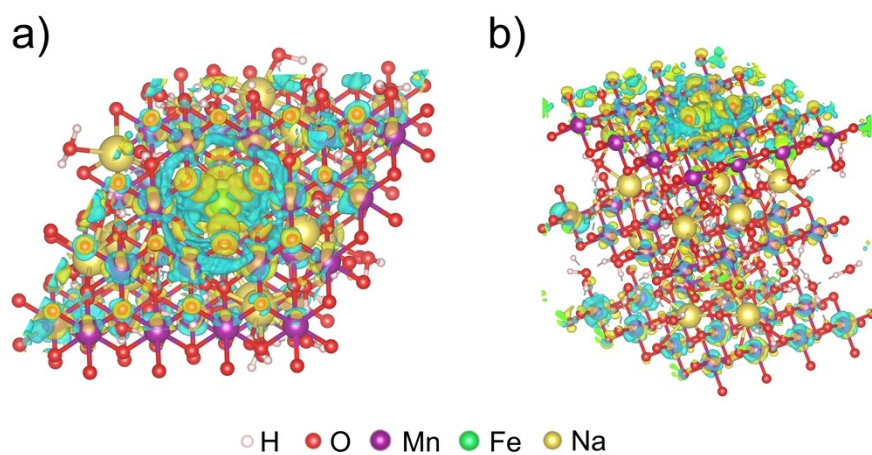

**Fig. S7** Charge density difference distributions of Fe-NMO·xH<sub>2</sub>O: (a) Top view, (b) Side view (blue and yellow represent electron-deficient and electron-rich regions, respectively).

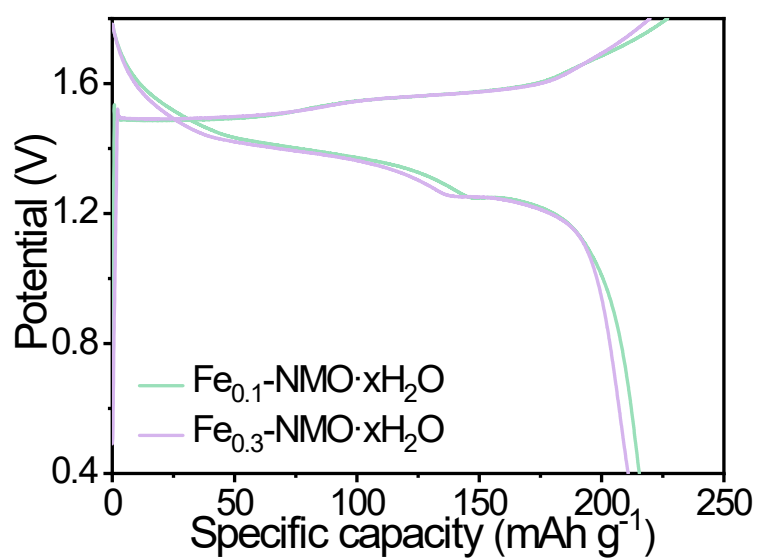

**Fig. S8** GCD profiles of the Fe<sub>0.1</sub>-NMO·xH<sub>2</sub>O and Fe<sub>0.3</sub>-NMO·xH<sub>2</sub>O at 0.2 A g<sup>-1</sup>.

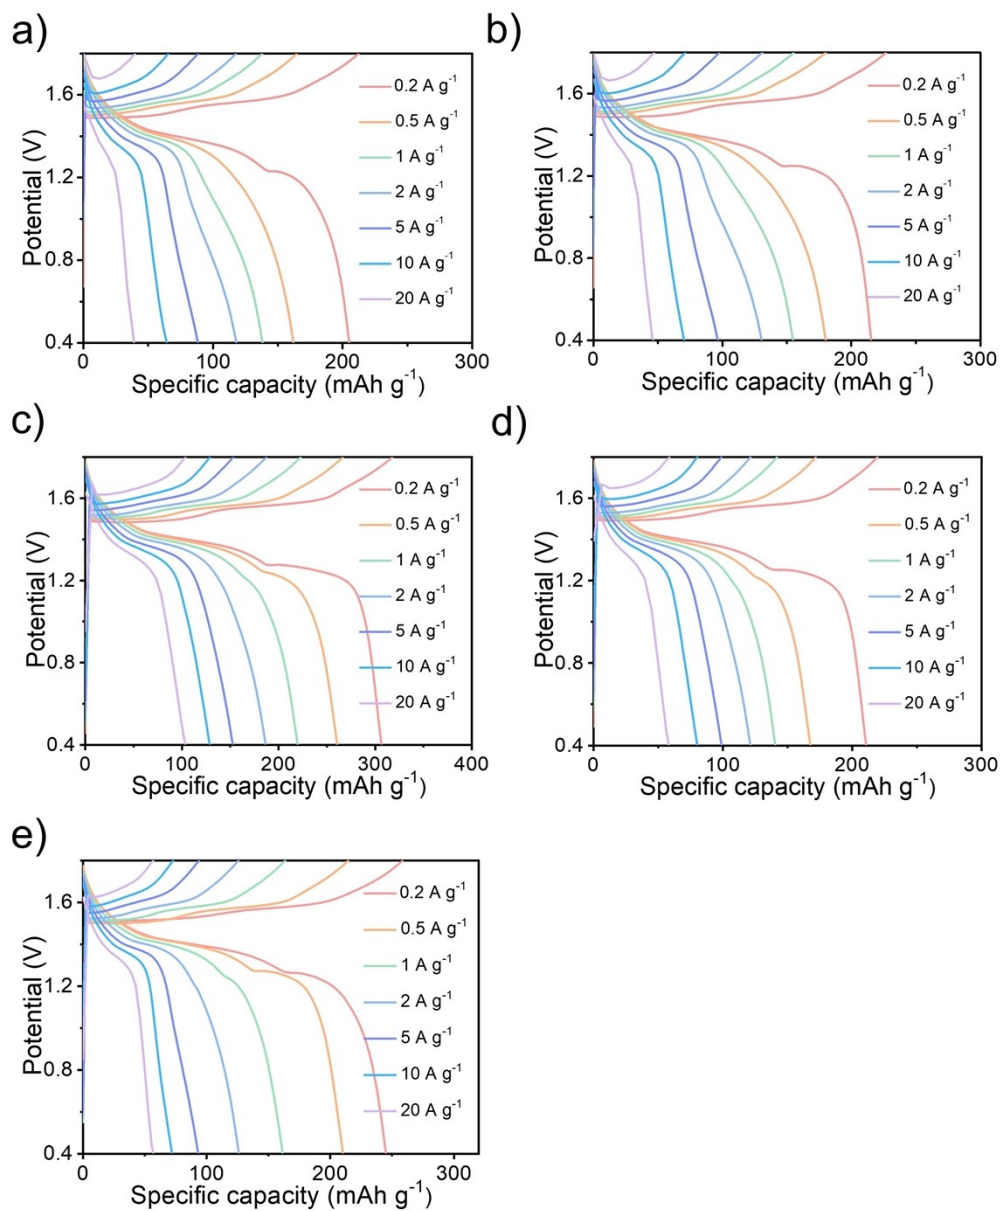

**Fig. S9** GCD profiles of the (a)  $\text{NMO} \cdot x\text{H}_2\text{O}$ , (b)  $\text{Fe}_{0.1}\text{-NMO} \cdot x\text{H}_2\text{O}$ , (c)  $\text{Fe-NMO} \cdot x\text{H}_2\text{O}$ , (d)  $\text{Fe}_{0.3}\text{-NMO} \cdot x\text{H}_2\text{O}$  and (e)  $\text{Fe-NMO} \cdot x\text{H}_2\text{O-T}$  at various current densities from 0.2 to 20  $\text{A g}^{-1}$ .

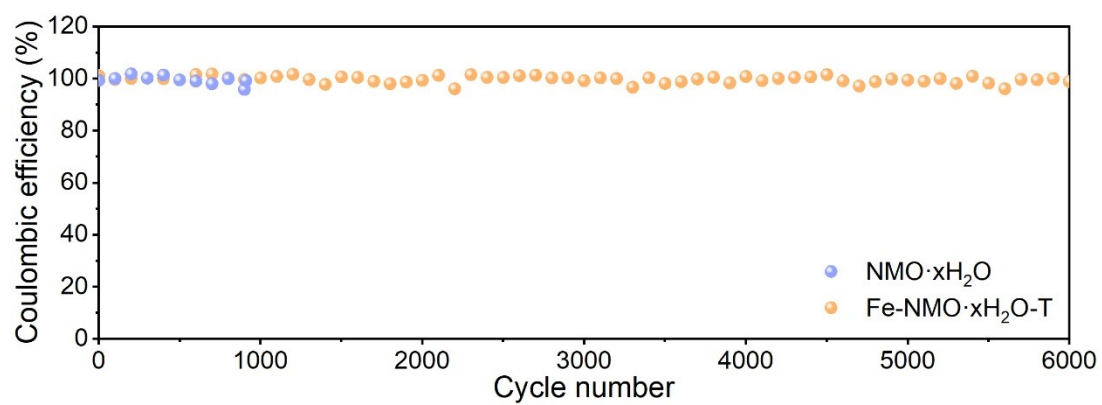

**Fig. S10** Coulombic efficiencies of the NMO·xH<sub>2</sub>O and Fe-NMO·xH<sub>2</sub>O-T cathodes.

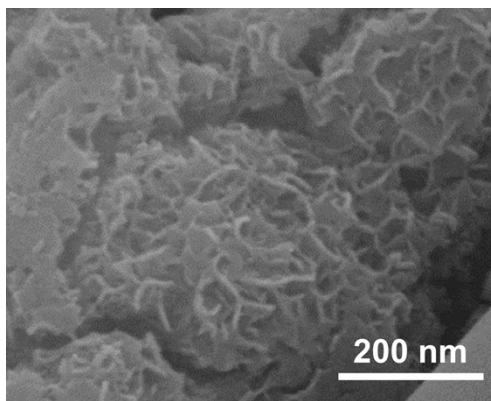

**Fig. S11** FESEM image of Fe-NMO·xH<sub>2</sub>O after the cycling test.



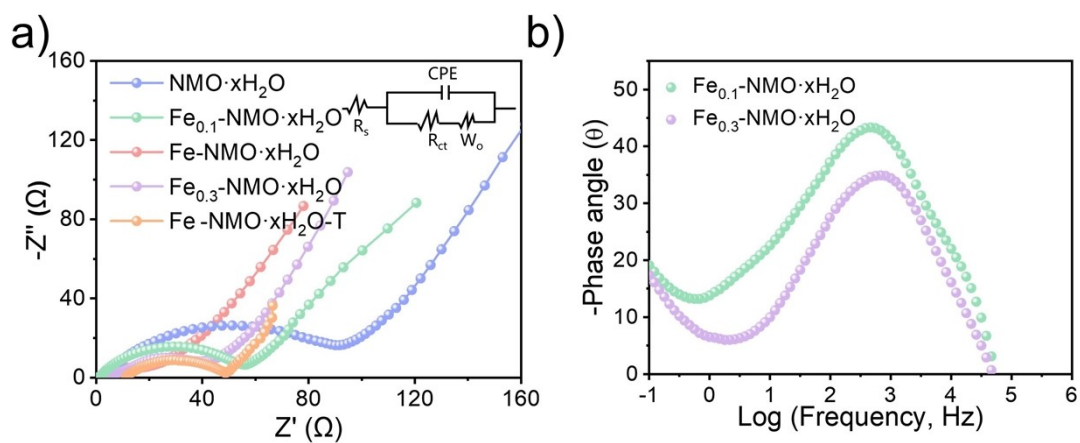

**Fig. S12** (a) EIS spectra of the NMO·xH<sub>2</sub>O, Fe<sub>0.1</sub>-NMO·xH<sub>2</sub>O, Fe-NMO·xH<sub>2</sub>O, Fe<sub>0.3</sub>-NMO·xH<sub>2</sub>O and Fe-NMO·xH<sub>2</sub>O-T cathodes, and (b) Bode phase angle plots of the Fe<sub>0.1</sub>-NMO·xH<sub>2</sub>O and Fe<sub>0.3</sub>-NMO·xH<sub>2</sub>O cathodes.

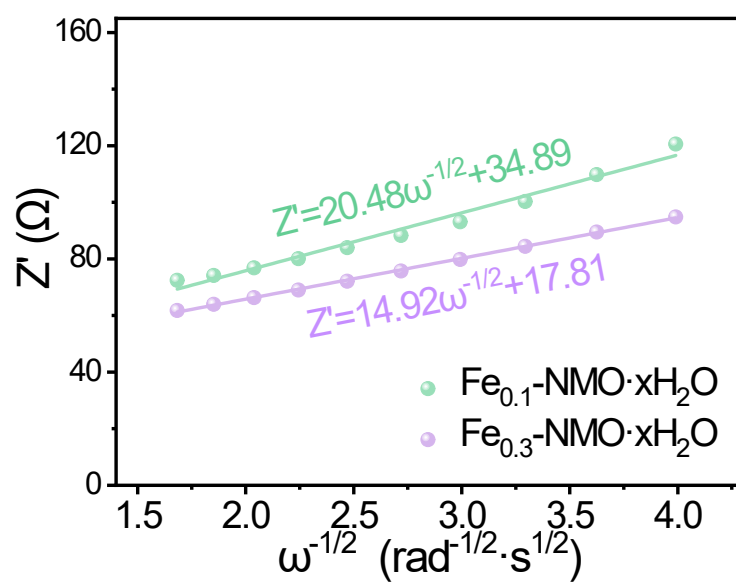

**Fig. S13** The relationships between the impedance in the real part and low frequencies of the Fe<sub>0.1</sub>-NMO·xH<sub>2</sub>O and Fe<sub>0.3</sub>-NMO·xH<sub>2</sub>O cathodes.

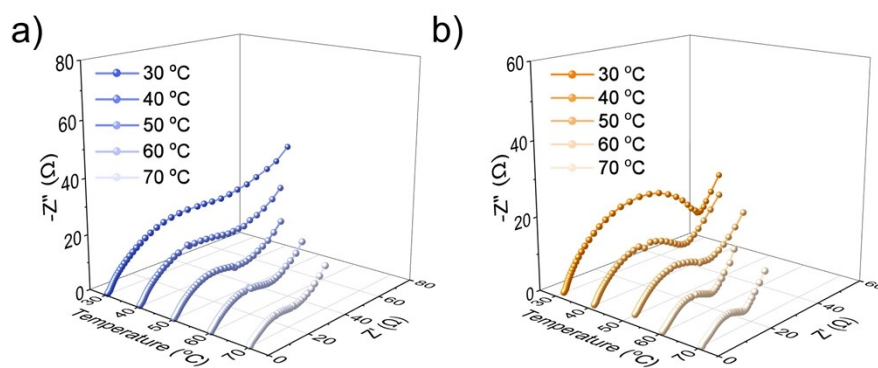

**Fig. S14** EIS spectra at different temperatures of the (a) NMO·xH<sub>2</sub>O and (b) Fe-NMO·xH<sub>2</sub>O-T cathodes.

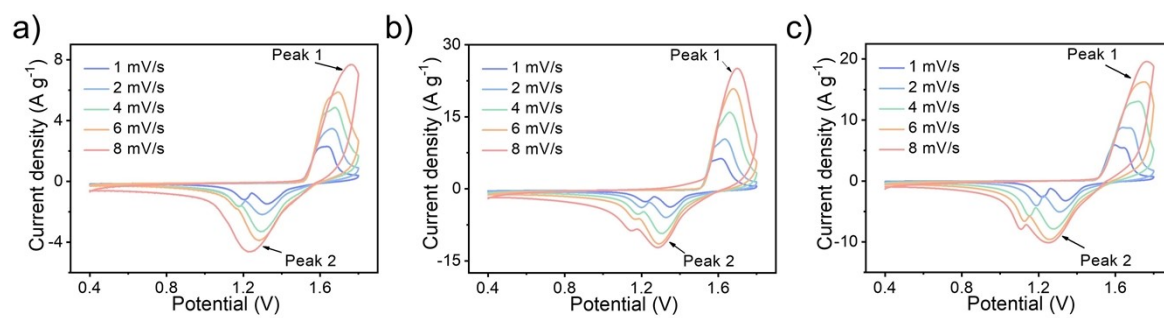

**Fig. S15** CV curves of the (a) NMO·xH<sub>2</sub>O, (b) Fe-NMO·xH<sub>2</sub>O, and (c) Fe-NMO·xH<sub>2</sub>O-T cathodes at various scan rates from 1 to 8 mV s<sup>-1</sup>.

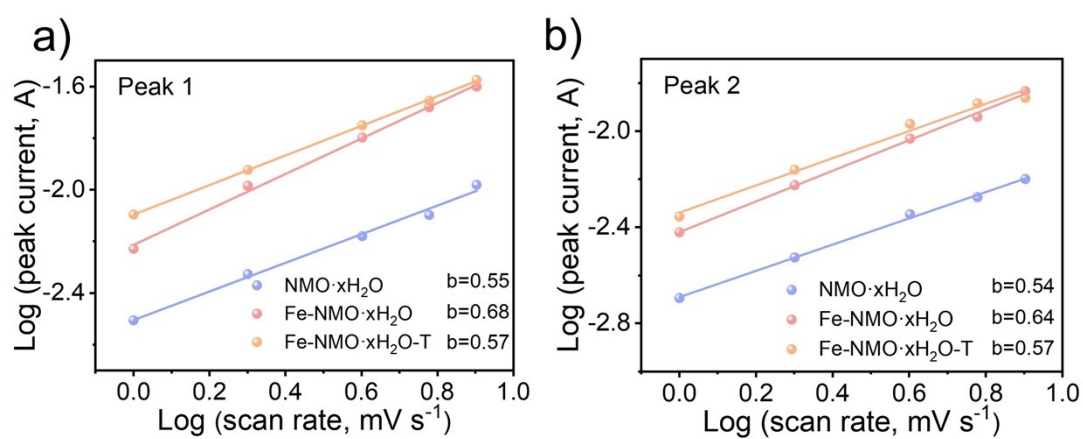

**Fig. S16** Relationship between the (a) anodic peak 1 and (b) cathodic peak 2 currents and scan rates for the NMO·xH<sub>2</sub>O, Fe-NMO·xH<sub>2</sub>O, and Fe-NMO·xH<sub>2</sub>O-T cathodes.

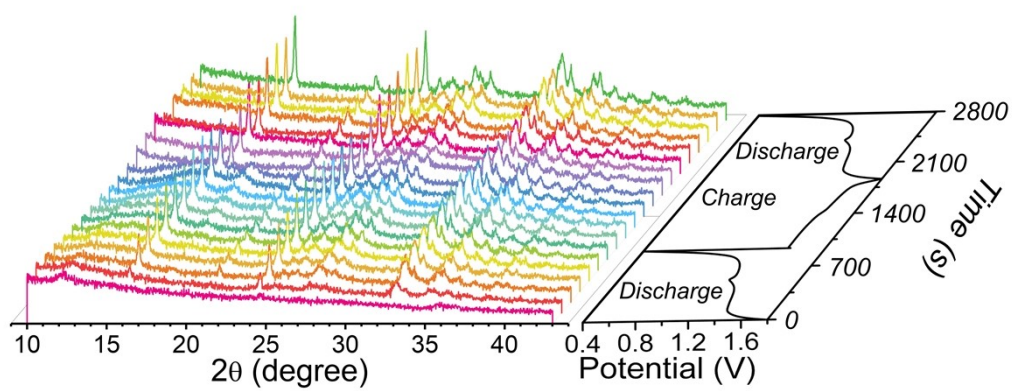

**Fig. S17** In situ XRD patterns of the Fe-NMO·xH<sub>2</sub>O during the GCD process.

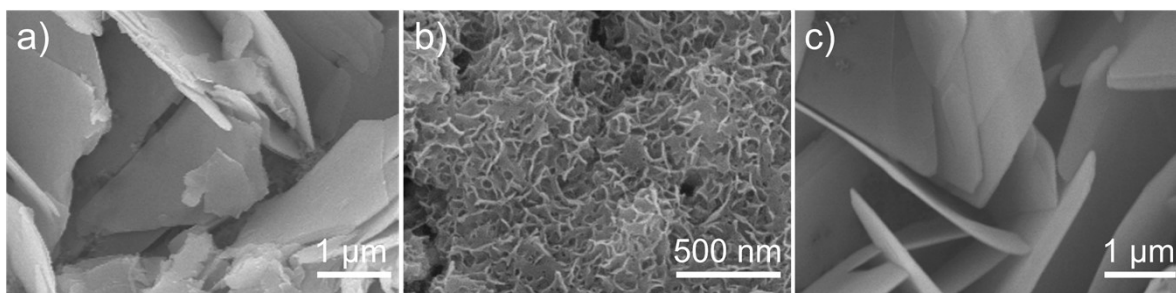

**Fig. S18** Ex situ FESEM images of the Fe-NMO·xH<sub>2</sub>O cathode at (a) fully discharged state, (b) fully charged state, and (c) re-discharged state.

## Supplementary Tables

**Table S1** Detailed cell parameters of the  $\text{NMO} \cdot x\text{H}_2\text{O}$ ,  $\text{Fe-NMO} \cdot x\text{H}_2\text{O}$ ,  $\text{Fe-NMO} \cdot x\text{H}_2\text{O-T}$  and based on Rietveld refinements.

| Samples                                     | a (Å) | b (Å) | c (Å) | $R_{\text{wp}}$ |
|---------------------------------------------|-------|-------|-------|-----------------|
| $\text{NMO} \cdot x\text{H}_2\text{O}$      | 5.18  | 2.84  | 7.22  | 7%              |
| $\text{Fe-NMO} \cdot x\text{H}_2\text{O}$   | 5.16  | 2.78  | 7.17  | 9%              |
| $\text{Fe-NMO} \cdot x\text{H}_2\text{O-T}$ | 5.17  | 2.83  | 6.83  | 6%              |



**Table S2** Comparisons of the specific capacity of Fe-NMO·xH<sub>2</sub>O with the previously reported electrode materials.

| Cathodes                                               | Maximum Capacity<br>(mAh g <sup>-1</sup> )            | Refs.                                           |
|--------------------------------------------------------|-------------------------------------------------------|-------------------------------------------------|
| Fe-NMO·xH <sub>2</sub> O                               | 307 mAh g <sup>-1</sup> at 0.2 A g <sup>-1</sup>      | This work                                       |
| δ-MnO <sub>2</sub>                                     | 219.58 mAh g <sup>-1</sup> at 1.5 mA cm <sup>-2</sup> | Adv. Sci. 2020, 7,<br>1902795.                  |
| MoS <sub>2</sub> /PEDOT                                | 306.6 mAh g <sup>-1</sup> at 0.1 A g <sup>-1</sup>    | Angew. Chem. Int. Ed.<br>2022, 61, e202211478.  |
| KZnHCF                                                 | 68.1 mAh g <sup>-1</sup> at 1 A g <sup>-1</sup>       | Adv. Energy Mater. 2021,<br>11, 2102342.        |
| G-NCGs                                                 | 113.8 mAh g <sup>-1</sup> at 0.5 A g <sup>-1</sup>    | Adv. Funct. Mater. 2021,<br>31, 2100443.        |
| PANI with PAGE                                         | 174.3 mAh g <sup>-1</sup> at 0.5 A g <sup>-1</sup>    | Angew. Chem. Int. Ed.<br>2023, 135, e202215060. |
| PA-VOPO <sub>4</sub> ·2H <sub>2</sub> O                | 268.2 mAh g <sup>-1</sup> at 0.1 A g <sup>-1</sup>    | Energy Environ. Sci.,<br>2021, 14, 4095.        |
| K <sub>1.6</sub> Mn <sub>1.2</sub> Fe(CN) <sub>6</sub> | 65 mAh g <sup>-1</sup> at 0.05 A g <sup>-1</sup>      | Energy Storage Mater.<br>2020, 29, 246.         |
| PFC-8                                                  | 139.4 mAh g <sup>-1</sup> at 2.5 A g <sup>-1</sup>    | Angew. Chem. Int. Ed.<br>2022, 61, e202209794.  |
| Zn <sub>0.5</sub> Mn <sub>2</sub> O <sub>4</sub>       | 299.7 mAh g <sup>-1</sup> at 0.1 C                    | Adv. Energy Mater. 2023,<br>13, 2203915.        |
| PTD-1                                                  | 145.56 mAh g <sup>-1</sup> at 0.1 A g <sup>-1</sup>   | Angew. Chem. Int. Ed.<br>2021, 60, 20826.       |

**Table S3** Comparisons of the rate performance of Fe-NMO·xH<sub>2</sub>O with the state-of-the-art manganese oxide-based electrode materials.

| Cathodes                                                              | Rate Capability                                                                   | Refs.                                 |
|-----------------------------------------------------------------------|-----------------------------------------------------------------------------------|---------------------------------------|
| <b>Fe-NMO·xH<sub>2</sub>O</b>                                         | <b>61% from 0.2 to 2 A g<sup>-1</sup><br/>33% from 0.2 to 20 A g<sup>-1</sup></b> | <b>This work</b>                      |
| MnO <sub>2</sub> /MoO <sub>3</sub>                                    | 33% from 0.2 to 2 A g <sup>-1</sup>                                               | ACS Nano 2023, 17, 15, 14792.         |
| Mg <sub>0.9</sub> Mn <sub>3</sub> O <sub>7</sub> ·2.7H <sub>2</sub> O | 42% from 0.2 to 5 A g <sup>-1</sup>                                               | Adv. Energy Mater. 2022, 12, 2201840. |
| MnO <sub>2</sub> /2.2 V-hold                                          | 36% from 0.2 to 2 A g <sup>-1</sup>                                               | Energy Storage Mater. 2023, 56, 524.  |
| MnO/MZ                                                                | 20% from 0.1 to 5 A g <sup>-1</sup>                                               | Adv. Funct. Mater. 2022, 32, 2106994. |
| Ni-Mn <sub>2</sub> O <sub>3</sub>                                     | 54% from 0.1 to 1 A g <sup>-1</sup>                                               | Adv. Funct. Mater. 2021, 31, 2009412. |
| a-MnBO <sub>x</sub>                                                   | 22% from 0.3 to 20 A g <sup>-1</sup>                                              | Adv. Sci. 2023, 10, 2205794.          |
| MnS/MnO                                                               | 50% from 0.1 to 2 A g <sup>-1</sup>                                               | Energy Storage Mater. 2022, 52, 180.  |
| KMO-V                                                                 | 30% from 0.1 to 1 A g <sup>-1</sup>                                               | Nano Energy 2022, 98, 107274.         |
| BMO-6                                                                 | 28% from 0.1 to 3 A g <sup>-1</sup>                                               | Energy Storage Mater. 2022, 48, 212.  |
| K-MnO <sub>x</sub>                                                    | 31% from 0.1 to 2 A g <sup>-1</sup>                                               | Adv. Sci. 2023, 10, 2207329.          |

**Table S4** Comparisons of the energy and power densities of the Zn//Fe-NMO·xH<sub>2</sub>O device with other state-of-the-art ZIBs.

| Cathodes                                                            | Voltage window (V) | Maximum Energy Density (Wh kg <sup>-1</sup> ) | Maximum Power Density (W kg <sup>-1</sup> ) | Refs.                                 |
|---------------------------------------------------------------------|--------------------|-----------------------------------------------|---------------------------------------------|---------------------------------------|
| Fe-NMO·xH <sub>2</sub> O                                            | 0.4–1.8            | 415.3                                         | 27638                                       | This work                             |
| NH <sub>4</sub> V <sub>4</sub> O <sub>10</sub>                      | 0.3–1.7            | 228                                           | 2533                                        | Adv. Funct. Mater. 2021, 31, 2107652. |
| MnO                                                                 | 0.8–1.8            | 383.88                                        | \                                           | Energy Storage Mater. 2020, 24, 394.  |
| N-CNSs@MnO <sub>2</sub>                                             | 1.0–1.8            | 361.5                                         | 10600                                       | Energy Storage Mater. 2020, 29 52.    |
| Na <sub>4</sub> VMn(PO <sub>4</sub> ) <sub>3</sub> @GN              | 0.4–2.0            | 309.7                                         | \                                           | Adv. Energy Mater. 2022, 12, 2200654. |
| DTT                                                                 | 0.3–1.4            | 126.5                                         | 1760.8                                      | Adv. Mater. 2020, 32, 2000338.        |
| ZnMn <sub>2</sub> O <sub>4</sub>                                    | 0.6–1.9            | 243                                           | 6480                                        | Energy Storage Mater. 2020, 28 407.   |
| KV <sub>2</sub> O <sub>4</sub> PO <sub>4</sub> ·3.2H <sub>2</sub> O | 0.2–1.8            | 193.8                                         | 7200                                        | Adv. Mater. 2020, 32, 2003592.        |
| Co-Mn <sub>3</sub> O <sub>4</sub> /CNA                              | 0.2–2.2            | 463.1                                         | 3111.3                                      | Adv. Energy Mater. 2021, 11, 2003203. |
| Poly(1,5-NAPD)                                                      | 0.1–1.8            | 195                                           | 10000                                       | Energy Storage Mater. 2020, 28, 64.   |

**Table S5** Comparisons of the cycling life of Fe-NMO·xH<sub>2</sub>O with the state-of-the-art manganese-based electrode materials.

| Cathodes                                                                                    | Cycling Life                              | Refs.                                       |
|---------------------------------------------------------------------------------------------|-------------------------------------------|---------------------------------------------|
| <b>Fe-NMO·xH<sub>2</sub>O</b>                                                               | <b>6,000 cycles at 5 A g<sup>-1</sup></b> | <b>This work</b>                            |
| Na <sub>4</sub> VMn(PO <sub>4</sub> ) <sub>3</sub> @GN                                      | 3,000 cycles at 5 A g <sup>-1</sup>       | Adv. Energy Mater. 2022, 12, 2200654.       |
| MMO-2                                                                                       | 1,000 cycles at 5 A g <sup>-1</sup>       | Adv. Funct. Mater. 2023, 33, 2301351.       |
| MnVO@C                                                                                      | 4,000 cycles at 5 A g <sup>-1</sup>       | Energy Environ. Sci., 2021, 14, 3954.       |
| (Na <sub>0.33</sub> , Mn <sub>0.65</sub> )V <sub>8</sub> O <sub>20</sub> ·nH <sub>2</sub> O | 1,000 cycles at 4 A g <sup>-1</sup>       | Adv. Sci. 2020, 7, 2000083.                 |
| Ce-MnO <sub>2</sub>                                                                         | 2,000 cycles at 6 C                       | Adv. Funct. Mater. 2023, 33, 2303009.       |
| MG                                                                                          | 3,000 cycles at 6 C                       | Energy Storage Mater. 2022, 52, 675.        |
| Cu-MnO <sub>2</sub>                                                                         | 1,000 cycles at 3 A g <sup>-1</sup>       | Angew. Chem. Int. Ed. 2023, 62, e202215654. |
| MnO <sub>2</sub> @PDAAQ                                                                     | 2,200 cycles at 3 A g <sup>-1</sup>       | Energy Storage Mater. 2022, 52, 675.        |
| ZnMn <sub>2</sub> O <sub>4</sub> @C                                                         | 2,000 cycles at 3 A g <sup>-1</sup>       | Adv. Sci. 2021, 8, 2002636.                 |

**Table S6** Simulation parameters of the EIS spectra for NMO·xH<sub>2</sub>O, Fe<sub>0.1</sub>-NMO·xH<sub>2</sub>O, Fe-NMO·xH<sub>2</sub>O, Fe<sub>0.3</sub>-NMO·xH<sub>2</sub>O, and Fe-NMO·xH<sub>2</sub>O-T.

| Samples                                  | R <sub>s</sub> (Ω) | R <sub>ct</sub> (Ω) | W <sub>o</sub> (Ω) |
|------------------------------------------|--------------------|---------------------|--------------------|
| NMO·xH <sub>2</sub> O                    | 6.34               | 101.20              | 18.63              |
| Fe <sub>0.1</sub> -NMO·xH <sub>2</sub> O | 1.13               | 58.70               | 14.86              |
| Fe-NMO·xH <sub>2</sub> O                 | 0.86               | 20.82               | 3.03               |
| Fe <sub>0.3</sub> -NMO·xH <sub>2</sub> O | 4.46               | 42.70               | 4.60               |
| Fe-NMO·xH <sub>2</sub> O-T               | 8.05               | 48.02               | 6.11               |

**Table S7** Simulation parameters of the in situ EIS spectra for Fe-NMO·xH<sub>2</sub>O.

|                      | <b>Potential<br/>(V)</b> | <b>R<sub>s</sub><br/>(Ω)</b> | <b>R<sub>ct</sub><br/>(Ω)</b> | <b>W<sub>o</sub><br/>(Ω)</b> |
|----------------------|--------------------------|------------------------------|-------------------------------|------------------------------|
| Discharge<br>Process | 1.8                      | 1.02                         | 21.21                         | 1.26                         |
|                      | 1.4                      | 1.85                         | 49.65                         | 2.37                         |
|                      | 1.0                      | 2.98                         | 80.02                         | 6.12                         |
|                      | 0.7                      | 3.87                         | 141.31                        | 9.13                         |
|                      | 0.4                      | 6.95                         | 196.44                        | 13.30                        |
| Charge<br>Process    | 0.4                      | 6.95                         | 196.44                        | 13.30                        |
|                      | 0.7                      | 5.29                         | 111.70                        | 8.54                         |
|                      | 1.0                      | 3.76                         | 76.88                         | 4.80                         |
|                      | 1.4                      | 2.04                         | 53.48                         | 2.96                         |
|                      | 1.8                      | 1.23                         | 25.70                         | 1.52                         |

## Supplementary References

- [1] P. Hohenberg and W. Kohn, *Phys. Rev.*, 1964 , **136**, B864-B871.
- [2] W. Kohn and L. J. Sham, *Phys. Rev.*, 1965, **140**, A1133-A1138.
- [3] P. E. Blöchl, *Phys. Rev. B*, 1994, **50**, 17953-17979.
- [4] G. Kresse and J. Hafner, *Phys. Rev. B*, 1993, **47**, 558-561.
- [5] J. P. Perdew, K. Burke and M. Ernzerhof, *Phys. Rev. Lett.*, 1996, **77**, 3865-3868.
- [6] C. Chen, K. Xu, X. Ji, B. Zhang, L. Miao and J. Jiang, *J. Mater. Chem. A*, 2015, **3**, 12461-12467.
- [7] S. Grimme, S. Ehrlich and L. Goerigk, *J. Comput. Chem.*, 2011, **32**, 1456-1465.
- [8] V. Wang, N. Xu and J. C. Liu, et al., *Comput. Phys. Commun.*, 2021, **267**, 108033.
- [9] K. Momma and F. Izumi, *J. Appl. Crystallogr.*, 2011, **44**, 1272-1276.
